# Supplementary material for: BehaviorDEPOT is a simple, flexible tool for automated behavioral detection based on markerless pose tracking
Source: eLife. 2022 Aug 23;11:e74314. doi: 10.7554/eLife.74314 (PMC9398447; doi:10.7554/eLife.74314)
Supplement: Supplementary file 1. [file elife-74314-supp1.xlsx]

## Sheet: Tracking
Table 1. BehaviorDEPOT Keypoints
BODY PARTS - TRACKED
Nose
Left Ear
Right Ear
Left Leg
Right Leg
MidBack
Tailbase
Tail
Implant Base
Implant
Other
BODY PARTS - CALCULATED	FORMULA
Tracking.BetwEars	mean(Left Ear + Right Ear)
Tracking.BetwLegs	mean(Left Leg + Right Leg)
Tracking.Head	mean(Left Ear + Right Ear + Nose)
Tracking.MidBack	mean(BetweenEars + BetweenLegs) or mean(BetweenEars + Tailbase)
Tracking.BetwShoulders	mean(Left Ear, Right Ear, Midback)
Tracking.RearBack	mean(Left Leg, Right Leg, Tailbase)
