# Supplementary material for: BehaviorDEPOT is a simple, flexible tool for automated behavioral detection based on markerless pose tracking
Source: eLife. 2022 Aug 23;11:e74314. doi: 10.7554/eLife.74314 (PMC9398447; doi:10.7554/eLife.74314)
Supplement: Supplementary file 2. [file elife-74314-supp2.xlsx]

## Sheet: Metrics
Supplementary File 2. Metric Definitions
VARIABLE NAME	FORMULA	UNITS	DESCRIPTION
Postural Metrics
Metrics.Dist.KeypointPair	sqrt((Keypoint2(X)-Keypoint1(X))2+((Keypoint2(Y)-Keypoint1(Y)2)	cm	Distance between two body parts
Metrics.degBodypartAngle	arctan(Keypoint2(Y)-Keypoint1(Y), Keypoint2(X)-Keypoint1(X))	deg	Angles relative to the positive x axis
Kinematics
Metrics.Diff.KeypointAngle	((angle(i+1)-angle(i) + 180)/360 – 180)	deg/frame	Angle change by frame, used to calculate angular velocity
Metrics.Diff.Keypoint	x(i+1) - x(i) * framerate / resolution	cm/s	Distance change by frame, used to calculate linear velocity and accleration
Metrics.Velocity.KeypointAngle	((angle(i+1)-angle(i) + 180)/360 – 180)*framerate	deg/s	Angular velocity of a keypoint-based angle
Metrics.Velocity.Keypoint	sqrt((dx/dt)2+(dy/dt)2)	cm/s	Linear velocity of a keypoint
Metrics.Acceleration.Keypoint	dv/framerate	cm/s2	Linear acceleration of a keypoint
Distance Metrics
Metrics.DistanceTraveled	cumulative sum(distance/frame)*resolution	cm	Distance travelled throughout session based on central point
