# Supplementary material for: BehaviorDEPOT is a simple, flexible tool for automated behavioral detection based on markerless pose tracking
Source: eLife. 2022 Aug 23;11:e74314. doi: 10.7554/eLife.74314 (PMC9398447; doi:10.7554/eLife.74314)
Supplement: Supplementary file 3. [file elife-74314-supp3.xlsx]

## Sheet: Modules
Supplementary File 3. Module Inputs and Outputs
INPUTS (Provided by User)	OUTPUTS (Automatically Generated)
Analysis Module	Data Structures	Visualizations
DLC tracking	Tracking.mat	Spatial trajectory
Video file	Metrics.mat	Spatiotemporal trajectory
Cue file	Params.mat	Behavior locations
	Behavior.mat	Behavior bouts
Inter-Rater Module
hBehavior.mat (multiple raters)	IR_Results.mat	% agreement heatmap
	Error table	rater disagreement heatmap
		Percent overlap heatmap
		Interrater performance heatmap
Data Exploration Module
Focused Exploration
Analyzed Folder (BehaviorDEPOT output)	GLM model	Histograms comparing values in behavior+ and behavior- frames
hBehavior.mat	Results.txt (descriptive statistics)	Box plots comparing values in behavior+ and behavior- frames
		Estimated probability of behavior based on GLM (heatmap)
Broad Exploration
Analyzed Folder (BehaviorDEPOT output)	GLM model
hBehavior.mat	Ranked list of predictors
Optimization Module
Behavior.mat	oResults.mat	F1, precision, and recall heatmaps
Params.mat
Metrics.mat
hBehavior.mat
Validation Module
Behavior.mat
hBehavior.mat	vResults.mat	F1, precision, and recall heatmaps
Experiment Module
Experiment design	Stimulus IDs, Stimulus parameters, event timestamps
