# Supplementary material for: BehaviorDEPOT is a simple, flexible tool for automated behavioral detection based on markerless pose tracking
Source: eLife. 2022 Aug 23;11:e74314. doi: 10.7554/eLife.74314 (PMC9398447; doi:10.7554/eLife.74314)
Supplement: Supplementary file 4. [file elife-74314-supp4.xlsx]

## Sheet: ClassifierValidation
Supplementary File 4. Validation Data Sets	DLC Models		Held-out videos for classifier testing
VIDEO TYPE	DLC Train error	DLC Test error	# Videos	Total frames	Frame rate	Resolution
Mouse Fear Conditioning- FLIR Camera	0.74	1.44	6	36000	50	32pix/cm
Mouse Fear + Optogenetics- FLIR Camera	1.82	4.09	5	30000	50	32pix/cm
Mouse Fear Conditioning- Webcam	0.98	2.26	6	21600	30	23pix/cm
Mouse Fear Conditioning- MiniCAM	2.76	5.68	5	46069	50	31pix/cm
Rat Fear Conditioning (external lab)	1.04	5.93	4	40320	75	7pix/cm
Mouse Fear Conditioning (external lab)	1.12	4.45	4	14400	30	25pix/cm
Mouse Novel Object	1.64	1.95	4	71672	30	23pix/cm
Mouse T-Maze VTE	3.72	3.6	4	72278	15–30	13pix/cm
