# Supplementary material for: BehaviorDEPOT is a simple, flexible tool for automated behavioral detection based on markerless pose tracking
Source: eLife. 2022 Aug 23;11:e74314. doi: 10.7554/eLife.74314 (PMC9398447; doi:10.7554/eLife.74314)
Supplement: Supplementary file 5. [file elife-74314-supp5.xlsx]

## Sheet: ClassifierValidation
Supplementary File 5	DLC Models		Training Videos
DLC Model #	DLC Train error	DLC Test error	Total frames	Frame rate	Resolution
1	0.74	1.44	741	50	32pix/cm
2	1.11	2.52	547	50	32pix/cm
3	1.12	4.45	100	50	32pix/cm
4	1.22	5.77	300	50	32pix/cm
5	0.88	6.03	300	50	32pix/cm
6	2.03	6.15	300	50	32pix/cm
7	2.04	6.67	300	30	32pix/cm
8	0.57	7.75	100	50	32pix/cm
9	0.94	7.81	100	50	32pix/cm
10	0.76	8.65	100	50	32pix/cm
